# Supplementary material
Source: Research Square preprint supplement (doi:10.21203/rs.3.rs-9530006/v1)
Supplement: Supplementary file 1 [file bae4dbf0429fbc841b7a7ffd.docx]

| 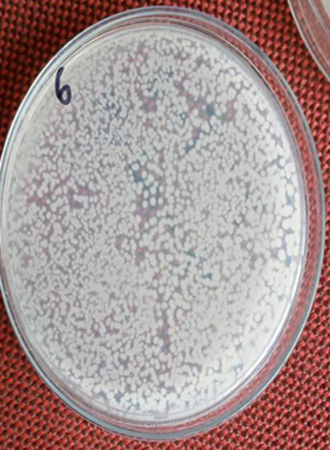  **Nutrient Agar**  **A** | 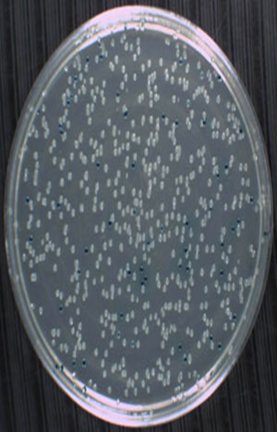  **B** | 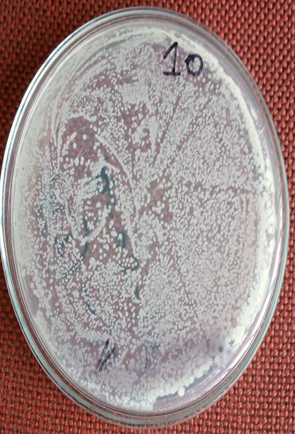  **C** |
| --- | --- | --- |
| A. Raw tap water spread plate culture | B. Raw tube-well water spread plate culture | C. Raw reused plate cleaning water spread plate culture |
| 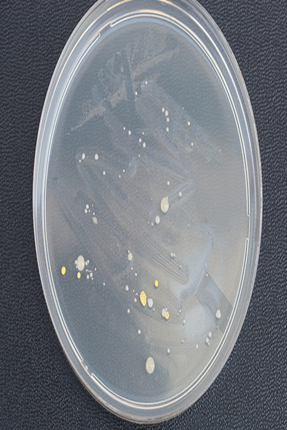  **D** | 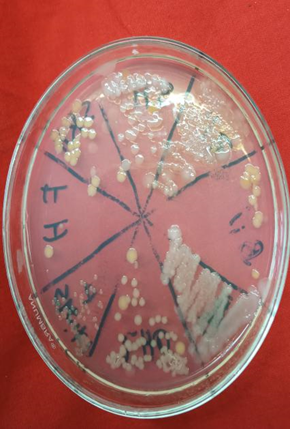  **E** | 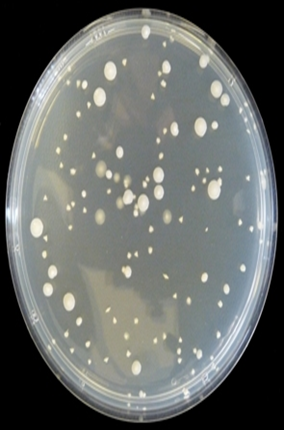  **F** |
| D. 10-3 times diluted tap water streak plate culture | E. 10-1 times diluted reused plate cleaning water streak culture | F. 10-3 times diluted tap water spread plate culture |
| 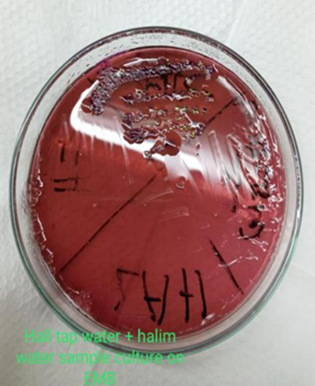  **A** | 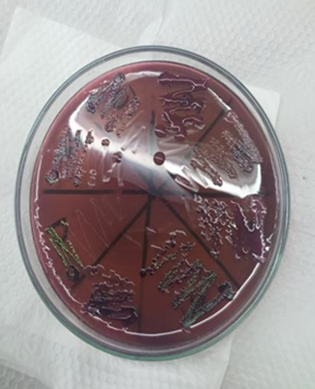  **B** | 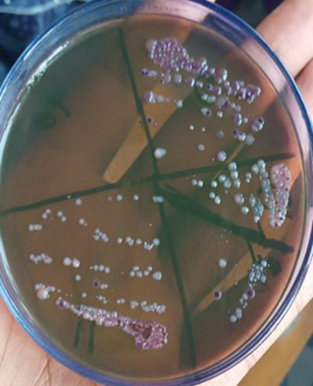  **C** |
| A. No E.coli in tap water but E.coli in reused plate cleaning water | B. E.coli in reused plate cleaning water | C. No E.coli in tube-well water |
| 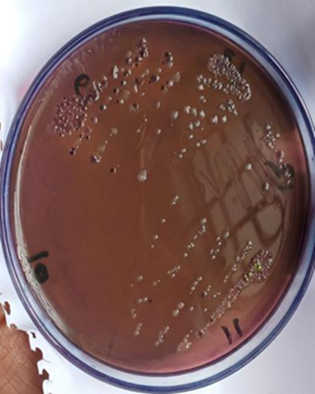  **D** | 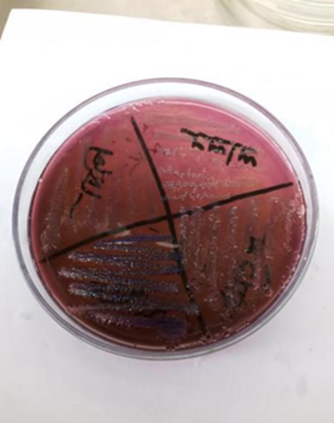  **E** | 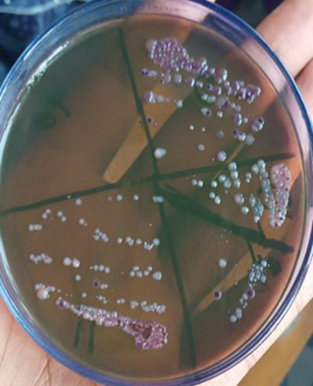  **F** |
| D. E.coli in reused plate cleaning water | E. No E.coli on nutrient broth reached tubewell water | F. E.coli streak plate culture |

**Eosin Methylene Blue agar:**

| 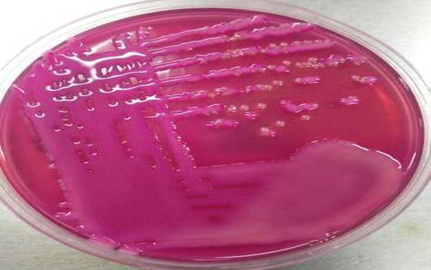  **B**  **A** | 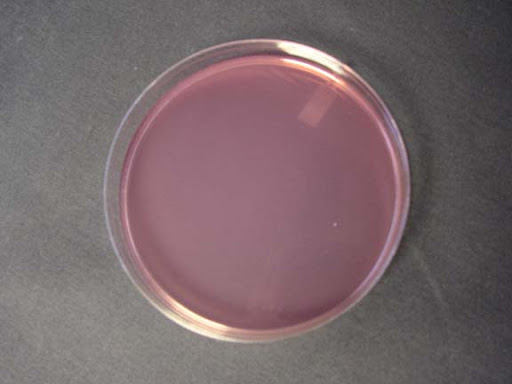 | 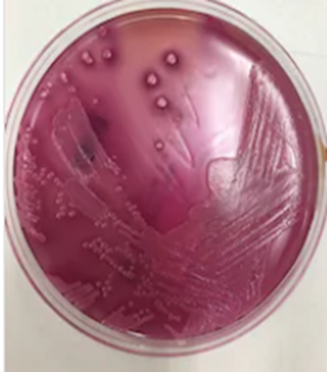  **C** |
| --- | --- | --- |
| A. Staphylococcus growth from dish cleaning water | B. No growth observed from tap or tube-well water | C. E.coli growth from dish cleaning water |

**Mannitol Salt Agar**:

**MacConkey Agar:**

| 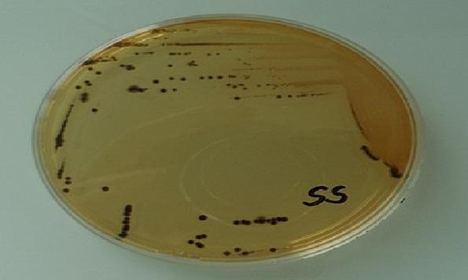  **A** | 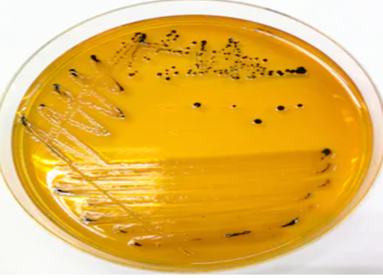  **B** |
| --- | --- |
| A. Salmonella grow from reused plate cleaning water | B. Salmonella grow from reused dish cleaning water |
| 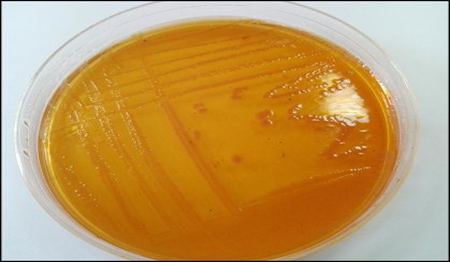  **C** | 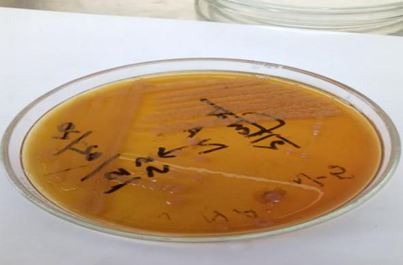  **D** |
| C. Shigella grow from reused plate cleaning water | D. Shigella grow from reused dish cleaning water |
| | 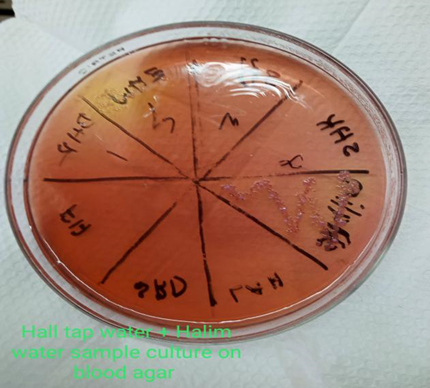  **Blood Agar**  **A** | 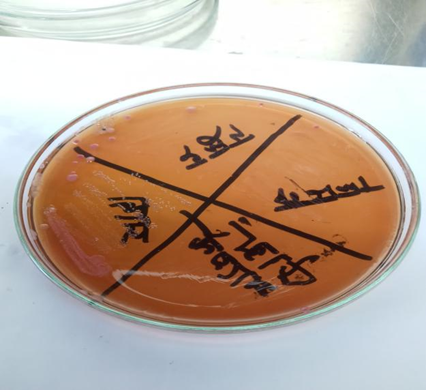  **B** | | --- | --- | | Staphylococcus aureus on blood agar from reused plate cleaning water | Klbessila grow from reused plate cleaning water | |  |

| 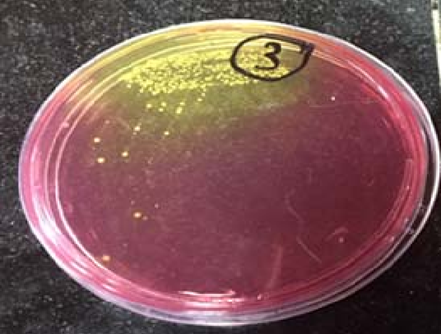  **B**  **A** | 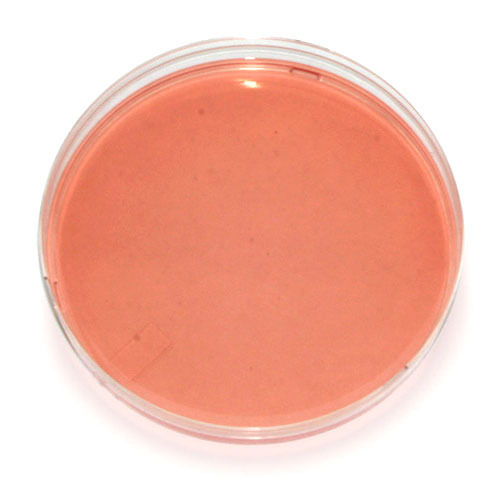 | 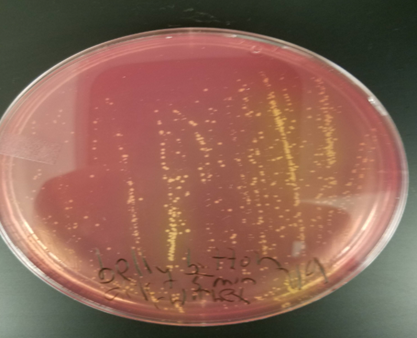  **C** |
| --- | --- | --- |
| A. Staphylococcus aureus from reused plate cleaning water | B. No growth observed from tap and tubewell water | C. Staphylococcus aureus from reused plate cleaning water |

**Salmonella Shigella media**

| 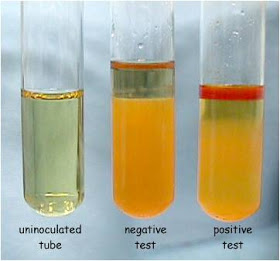  **A** | 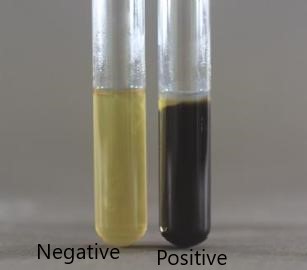  **B** |
| --- | --- |
| A. Indole Test | B. H2S Test |
| 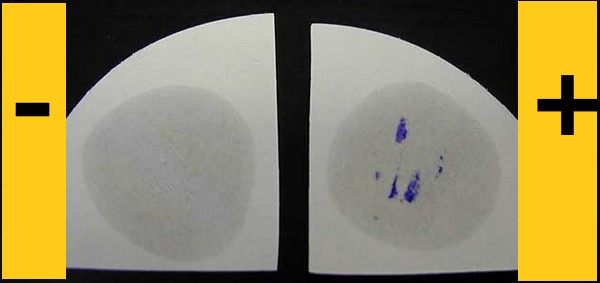  **C** | 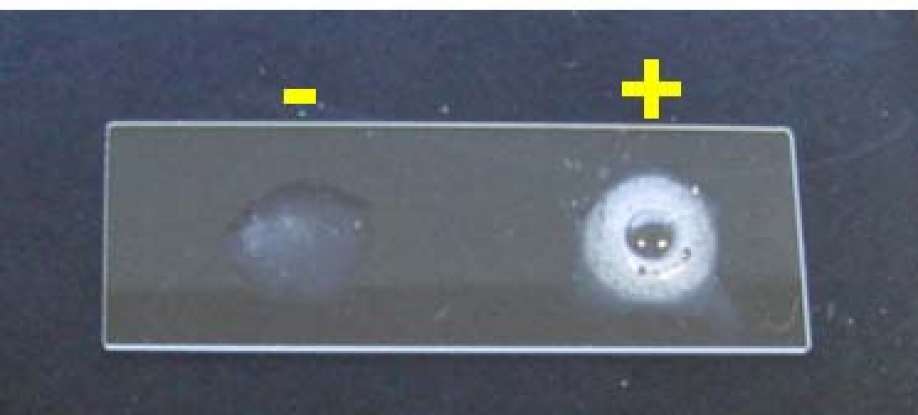  **D** |
| C. Oxidase Test | D. Catalase Test |
| 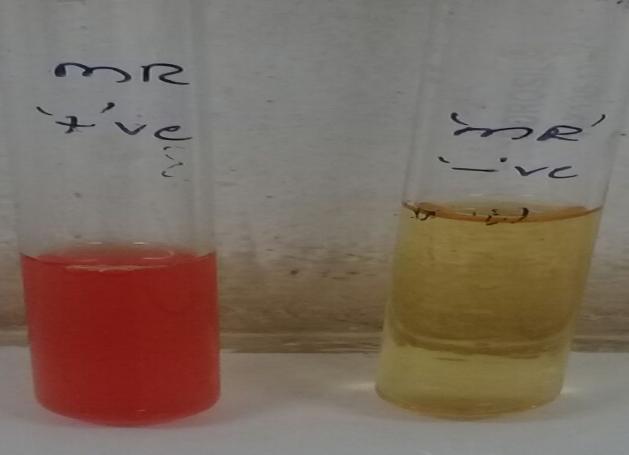 | 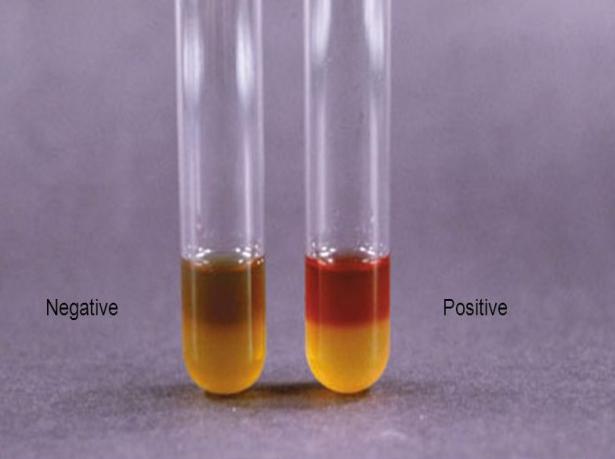  **F** |
| E. MR Test | F. VP Test |

**E**
